# Supplementary material for: A label-free and sensitive fluorescence strategy for screening ligands binding to poly(dA) based on exonuclease I-assisted background noise reduction
Source: Royal Society of Chemistry journal article supplement (doi:10.1039/c3ay40974k), 2013-01-01
Supplement: c3ay40974k.pdf [file c3ay40974k.pdf]

## Electronic Supplementary Information (ESI)

for

### A label-free and sensitive fluorescence strategy for screening ligands binding to poly(dA) based on exonuclease I-assisted background noise reduction

Hai-Bo Wang,\*<sup>a,b</sup> Yong-Hong Li,<sup>c</sup> Ke-Jing Huang,<sup>a</sup> Xin-Sheng Liu,<sup>d</sup>  
Yan-E Yang,<sup>a</sup> Yan-Ming Liu<sup>a</sup>

<sup>a</sup> *College of Chemistry and Chemical Engineering, Xinyang Normal University,  
Xinyang 464000, PR China*

<sup>b</sup> *State Key Laboratory of Chemo/biosensing and Chemometrics, Hunan University,  
Changsha 410082, PR China*

<sup>c</sup> *School of Public Health, Ningxia Medical University, Yinchuan 750004, PR China*

<sup>d</sup> *Higher Vocational Technical School, Ningxia Medical University, Yinchuan 750004,  
PR China*

Tel.: +86 376 6391172; Fax: +86 376 6391172.

E-mail address: wanghaibohn@163.com (H.-B. Wang)

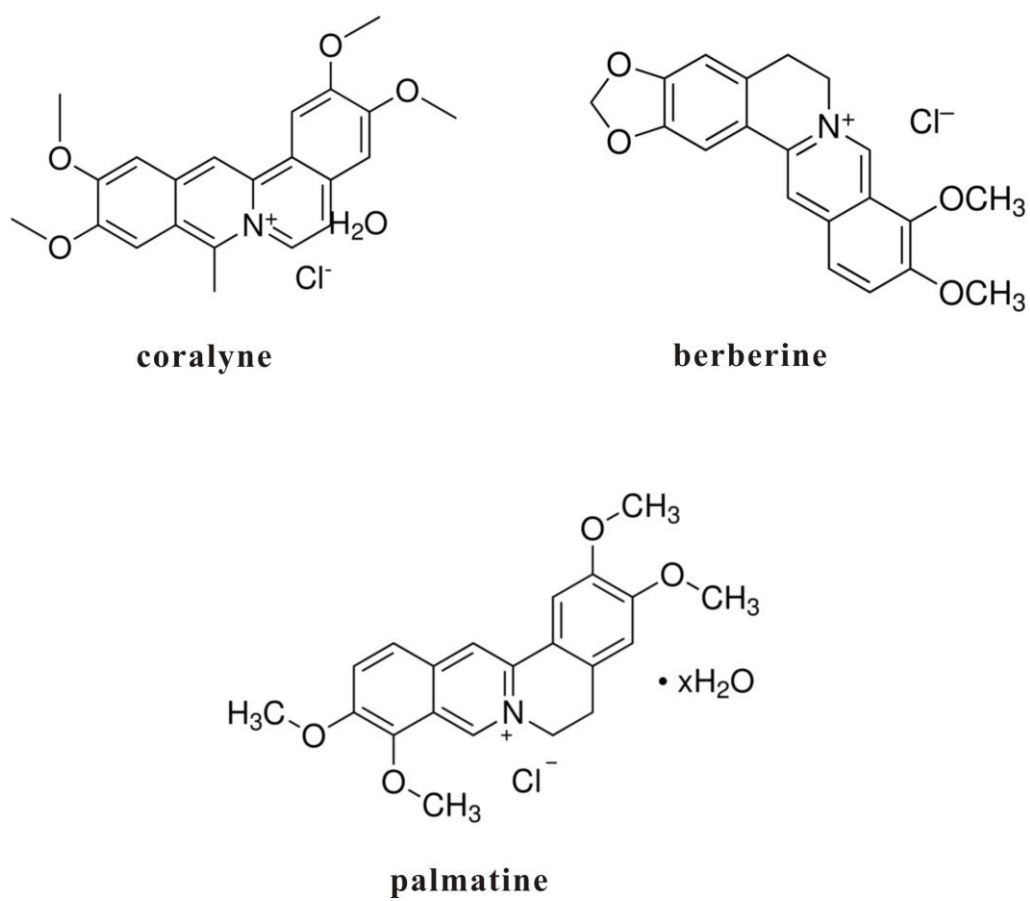

**Fig. S1** The chemical structure of the ligands.

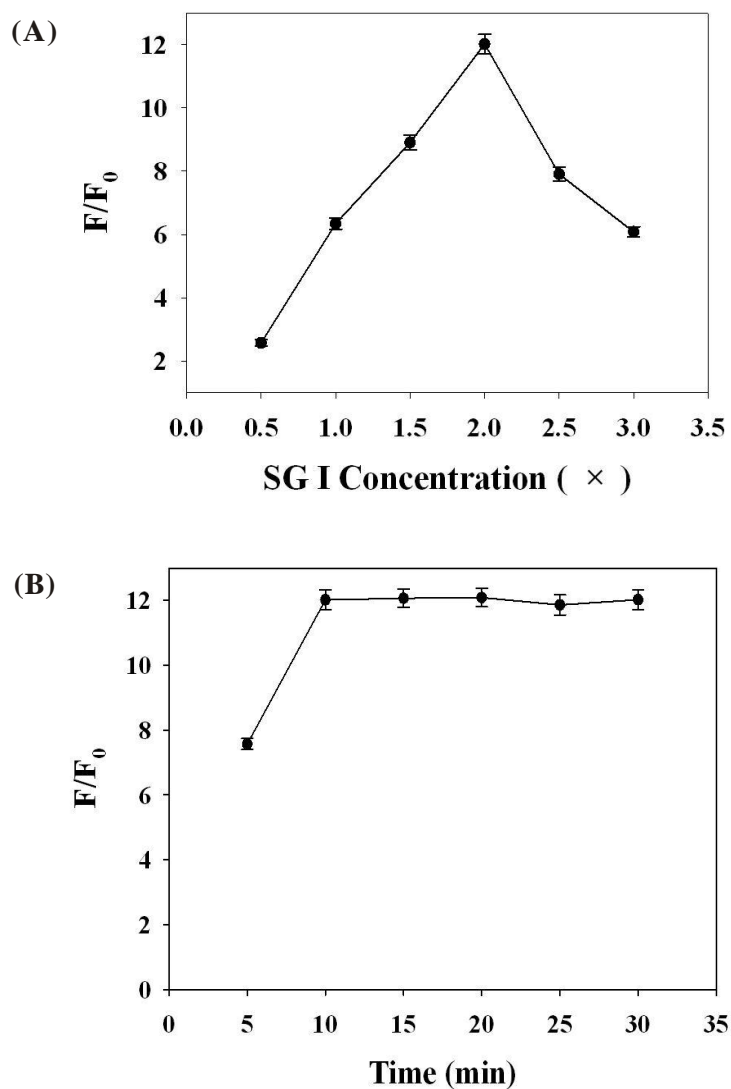

**Fig. S2** (A) The effect of the concentration of SG I on the fluorescence intensity of the sensing system. (B) The effect of the incubation time between SG I and A16/coralyne complex.
